# Supplementary material for: Effects of the anion salt nature on the rate constants of the aqueous proton exchange reactions
Source: Royal Society of Chemistry journal article supplement (doi:10.1039/c2cp24058k), 2012-01-01
Supplement: c2cp24058k.pdf [file c2cp24058k.pdf]

Electronic Supplementary Information for  
**Effect of the Anion Salt Nature on the Rate Constants of the  
Aqueous Proton Exchange Reactions**

Jose M. Paredes, Andres Garzon, Luis Crovetto, Angel Orte, Sergio G. Lopez, Jose M.  
Alvarez-Pez\*

|           |    |
|-----------|----|
| Figure S1 | S2 |
| Figure S2 | S2 |
| Figure S3 | S3 |
| Figure S4 | S3 |
| Figure S5 | S4 |
| Figure S6 | S4 |
| Scheme S1 | S5 |

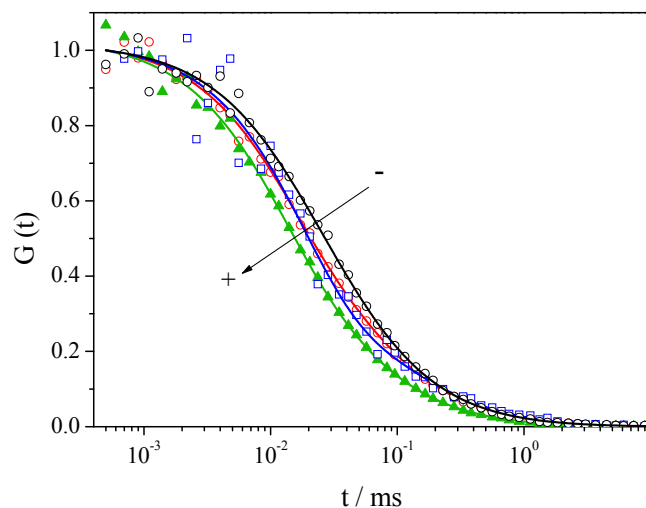

**Figure S1.** Normalized FLCS curves of TG-II anion at pH 6.10 in the presence of sodium perchlorate  $10^{-4}$  M ( $\square$ ),  $10^{-3}$  M ( $\circ$ ), and  $10^{-2}$  M ( $\blacktriangle$ ). The arrow indicates the increment of  $\text{NaClO}_4$  concentration. The FLCS curve of TG-II anion in the absence of salt and pH 9.50 ( $\circ$ ) is also included for comparison. The lines represent the best fits to equation (1).

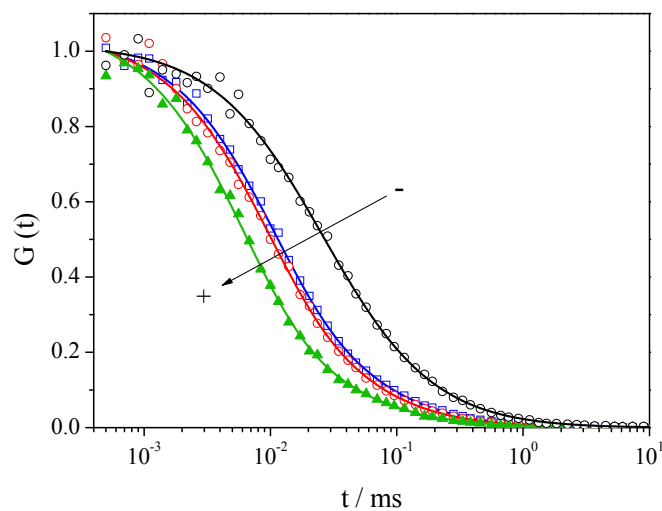

**Figure S2.** Normalized FLCS curves of TG-II anion at pH 6.00 in the presence of sodium nitrate  $10^{-4}$  M ( $\square$ ),  $10^{-3}$  M ( $\circ$ ), and  $10^{-2}$  M ( $\blacktriangle$ ). The arrow indicates the increment of  $\text{NaNO}_3$  concentration. The FLCS curve of TG-II anion in the absence of salt and pH 9.50 ( $\circ$ ) is also included for comparison. The lines represent the best fits to equation (1).

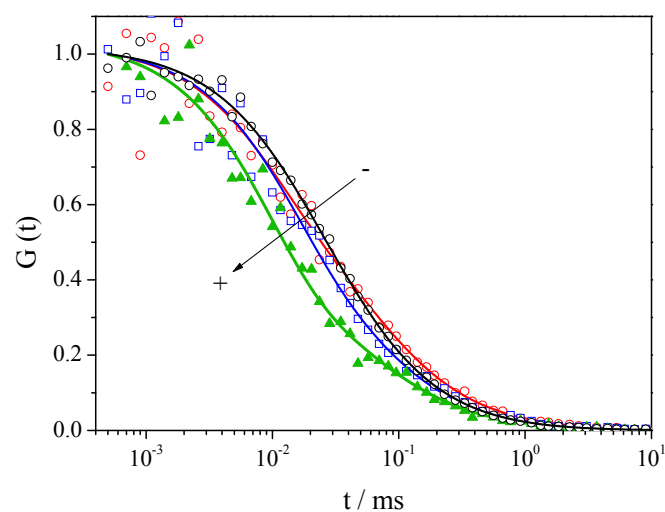

**Figure S3.** Normalized FLCS curves of TG-II anion at pH 6.70 in the presence of sodium hydrogen sulphate  $10^{-4}$  M ( $\square$ ),  $10^{-3}$  M ( $\circ$ ), and  $10^{-2}$  M ( $\blacktriangle$ ). The arrow indicates the increment of  $\text{NaHSO}_4$  concentration. The FLCS curve of TG-II anion in the absence of salt and pH 9.50 ( $\circ$ ) is also included for comparison. The lines represent the best fits to equation (1).

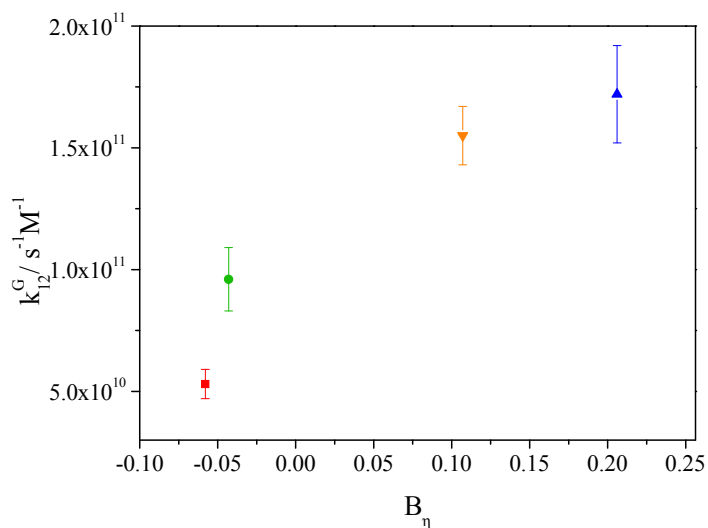

**Figure S4.** Protonation rate constant ( $k_{12}^G$ ) value of ( $\blacksquare$ )  $\text{NaClO}_4$ , ( $\bullet$ )  $\text{NaNO}_3$ , ( $\blacktriangledown$ )  $\text{NaF}$ , and ( $\blacktriangle$ )  $\text{NaHSO}_4$  vs B coefficient of the dynamic viscosity of each electrolyte solution (from reference 19).

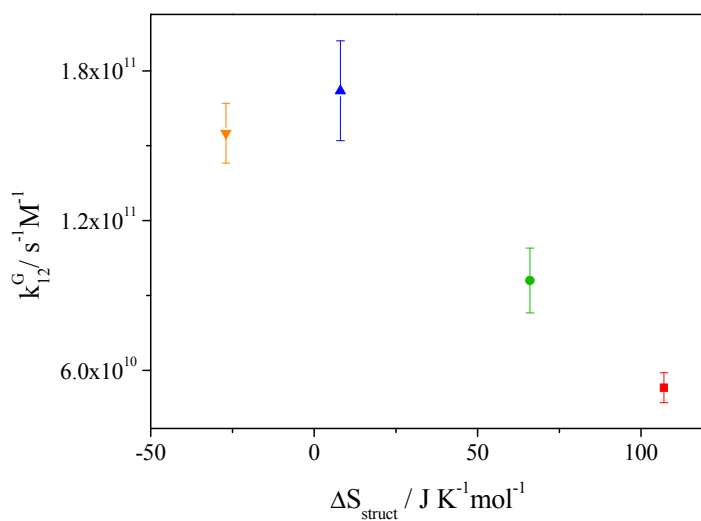

**Figure S5.** Protonation rate constant ( $k_{12}^G$ ) value of (■) NaClO<sub>4</sub>, (●) NaNO<sub>3</sub>, (▼) NaF, and (▲) NaHSO<sub>4</sub> vs water structural entropy ( $\Delta S_{\text{struct}}$ ) obtained according to treatments of Marcus (from reference 19).

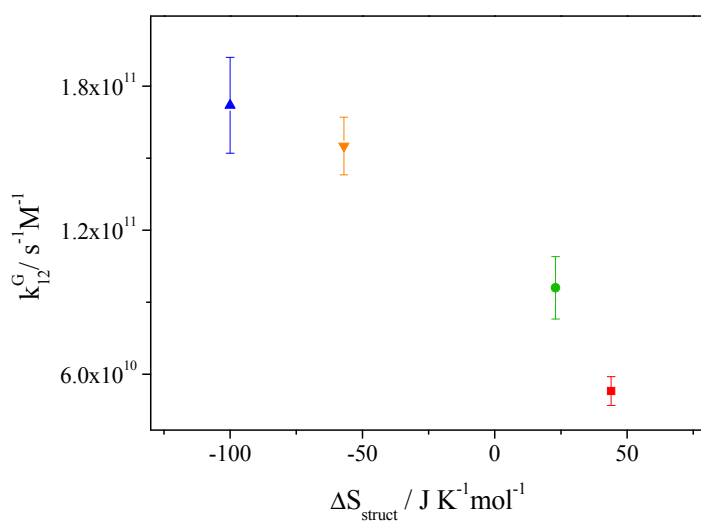

**Figure S6.** Protonation rate constant ( $k_{12}^G$ ) value of (■) NaClO<sub>4</sub>, (●) NaNO<sub>3</sub>, (▼) NaF, and (▲) NaHSO<sub>4</sub> vs water structural entropy ( $\Delta S_{\text{struct}}$ ) obtained according to treatments of Krestov (from reference 19).

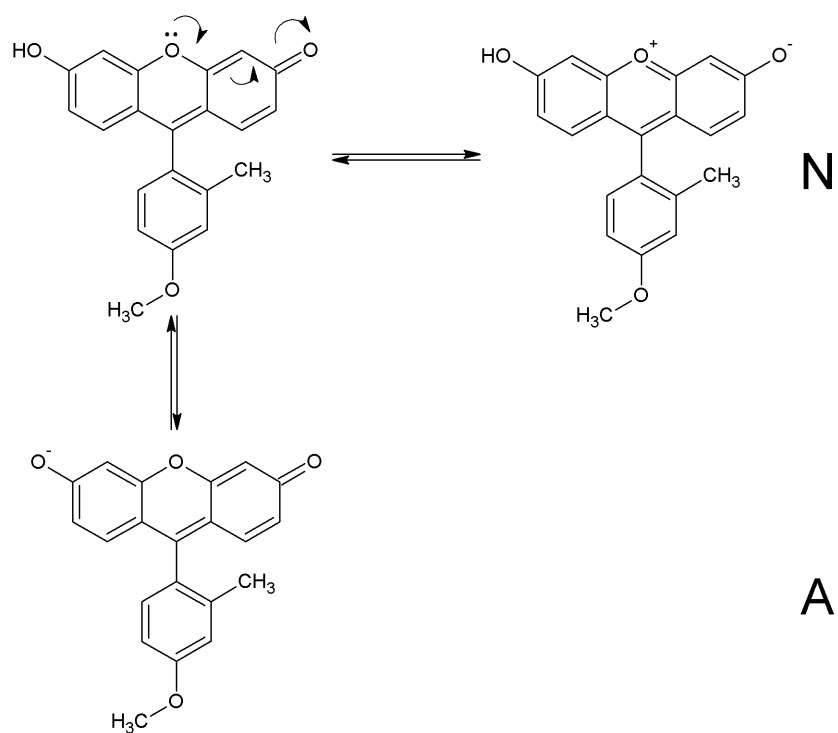

**Scheme S1.** Chemical structures and ground-state proton exchange reaction of TG-II forms at near neutral pH. **N** (neutral) and **A** (anion).
